# Supplementary material
Source: PubMed Central journal article supplement (PMC7426013)
Supplement: pr9b00706_si_001.pdf [file pr9b00706_si_001.pdf]

# **Metabolomics of the Mammary Gland related to Milk Production.**

## **Supporting Information**

Wei Xu<sup>1,2</sup>, Ariette van Knegsel<sup>\*1</sup>, Edoardo Saccenti<sup>3</sup>, Renny van Hoeij<sup>1</sup>, Bas Kemp<sup>1</sup> & Jacques Vervoort<sup>\*2</sup>

<sup>1</sup>Adaptation Physiology Group, Wageningen University & Research, Wageningen, The Netherlands

<sup>2</sup>Laboratory of Biochemistry, Wageningen University & Research, Wageningen, The Netherlands

<sup>3</sup>Systems and Synthetic Biology, Wageningen University & Research, Wageningen, The Netherlands

**Supplementary Table S1.** The milk metabolites detected either by Liquid chromatography–mass spectrometry (LC-MS), or by nuclear magnetic resonance (NMR), or by both.

| No. | Milk                     | Function                   | Detection by |     | Integrated region in NMR                 | C.V. |
|-----|--------------------------|----------------------------|--------------|-----|------------------------------------------|------|
|     |                          |                            | LC-MS        | NMR |                                          |      |
| 1   | Acetyl-carnitine         | Lipid metabolism           | LC-MS        | NMR | 2.149-2.146; 3.200-3.189                 |      |
| 2   | Acetate                  | Energy metabolism          |              | NMR | 1.931-1.919                              |      |
| 3   | Acetone                  | Lipid Metabolism           |              | NMR | 2.243-2.234                              |      |
| 4   | Acetylcholine            | Energy metabolism          | LC-MS        |     |                                          | 34   |
| 5   | cis-Aconitate            | Energy metabolism          |              | NMR | 5.729-5.709                              |      |
| 6   | Alanine                  | AAs metabolism             |              | NMR | 1.500-1.474                              |      |
| 7   | Arginine                 | AAs metabolism /Urea Cycle | LC-MS        |     |                                          | 23   |
| 8   | Aspartate                | AAs metabolism             | LC-MS        |     |                                          | 18   |
| 9   | $\beta$ -hydroxybutyrate | Lipid metabolism           |              | NMR | 1.203-1.194; 1.192-1.186                 |      |
| 10  | Butyrate                 | Lipid metabolism           |              | NMR | 2.167-2.160; 2.154-2.150;<br>1.588-1.538 |      |
| 11  | Carnitine                | Lipid metabolism           | LC-MS        |     |                                          | 20   |
| 12  | Choline                  | Lipid metabolism           | LC-MS        | NMR | 3.210-3.200                              |      |
| 13  | Citrate                  | Energy/Lipid metabolism    |              | NMR | 2.722-2.641; 2.581-2.508                 |      |
| 14  | Citrulline               | AAs metabolism/Urea cycle  | LC-MS        |     |                                          | 12   |
| 15  | Creatine                 | Protein degradation        |              | NMR | 3.044-3.034                              |      |
| 16  | Creatinine               | Protein degradation        |              | NMR | 3.049-3.044                              |      |
| 17  | CMP                      | Nucleotide metabolism      | LC-MS        | NMR | 7.986-7.957; 6.007-5.983                 |      |
| 18  | Ethanolamine             | Lipid metabolism           |              | NMR | 3.145-3.139                              |      |
| 19  | Fucose                   | Lipid metabolism           |              | NMR | 1.250-1.242                              |      |
| 20  | Formate                  | Energy metabolism          |              | NMR | 8.467-8.452                              |      |
| 21  | Fumarate                 | Energy metabolism          |              | NMR | 6.538-6.517                              |      |
| 22  | Galactose-1-P            | Lactose synthesis          |              | NMR | 5.525-5.486                              |      |
| 23  | Glucose-1-P              | Lactose synthesis          |              | NMR | 5.475-5.447                              |      |
| 24  | Glutamate                | AAs metabolism             | LC-MS        | NMR | 2.145-2.142; 2.376-2.338                 |      |
| 25  | Glutamine                | AAs metabolism             | LC-MS        |     |                                          | 20   |
| 26  | Glycine                  | AAs metabolism             | LC-MS        |     |                                          | 17   |
| 27  | GPC                      | Lipid metabolism           |              | NMR | 3.242-3.227                              |      |

|    |                         |                           |       |     |                                           |    |
|----|-------------------------|---------------------------|-------|-----|-------------------------------------------|----|
| 28 | Hippurate               | AAs/Energy metabolism     |       | NMR | 7.860-7.822; 7.666-7.623;<br>7.585-7.533  |    |
| 29 | Hydroxyproline          | AAs metabolism            | LC-MS |     |                                           | 17 |
| 30 | $\alpha$ -Ketoglutarate | Energy metabolism         | LC-MS | NMR | 3.027-2.999                               |    |
| 31 | Kynurenine              | AAs metabolism            | LC-MS |     |                                           | 24 |
| 32 | Lactose                 | Lactose synthesis         |       | NMR | 5.263-5.219; 4.507-4.415;<br>3.185-3.171  |    |
| 33 | Lactate                 | Energy Metabolism         |       | NMR | 1.346-1.321                               |    |
| 34 | Leucine                 | AAs metabolism            | LC-MS |     |                                           | 16 |
| 35 | Lysine                  | AAs metabolism            | LC-MS |     |                                           | 24 |
| 36 | Met (O)                 | AAs metabolism            | LC-MS |     |                                           | 13 |
| 37 | Nac-Gla/Nac-Glu         | Lipid metabolism          |       | NMR | 5.283-5.266; 5.219-5.202;<br>2.067-2.054  |    |
| 38 | Nac-NA                  | Lipid-metabolism          |       | NMR | 2.049-2.039                               |    |
| 39 | Isoleucine              | AAs metabolism            | LC-MS |     |                                           | 17 |
| 40 | Orotate                 | Nucleotide metabolism     |       | NMR | 6.208-6.189                               |    |
| 41 | Pantothenate            | Energy metabolism         | LC-MS |     |                                           | 30 |
| 42 | Phosphocholine          | Lipid metabolism          |       | NMR | 3.227-3.213                               |    |
| 43 | Phenylalanine           | AAs metabolism            | LC-MS |     |                                           | 14 |
| 44 | Phosphocreatine         | AAs metabolism            |       | NMR | 3.055-3.050                               |    |
| 45 | Proline                 | AAs metabolism            | LC-MS |     |                                           | 23 |
| 46 | Serine                  | AAs metabolism            | LC-MS |     |                                           | 15 |
| 47 | TMAO                    | AAs metabolism            |       | NMR | 3.273-3.263                               |    |
| 48 | UDP-Nac-Gal             | Lipid metabolism          |       | NMR | 8.084-8.040; 5.417-5.389;<br>2.082-2.074; |    |
| 49 | UDP-Nac-Glu             | Lipid metabolism          |       | NMR | 8.168-8.099; 5.376-5.344;<br>2.074-2.066  |    |
| 50 | Urea                    | AAs metabolism/Urea Cycle |       | NMR | 5.884-5.732                               |    |
| 51 | Uridine                 | Nucleotide metabolism     | LC-MS | NMR | 7.893-7.863                               |    |
| 52 | Threonine               | AAs metabolism            | LC-MS |     |                                           | 22 |
| 53 | Tryptophan              | AAs metabolism            | LC-MS |     |                                           | 18 |
| 54 | Tyrosine                | AAs metabolism            | LC-MS |     |                                           | 16 |
| 55 | Valine                  | AAs metabolism            | LC-MS | NMR | 1.043-1.036                               |    |

Abbreviations: CMP, cytidine monophosphate; GPC, Glycerophosphocholine; Glu-1-P, glucose-1-phosphate; Gal-1-P, galactose-1-phosphate; HYP, hydroxyproline; Met (O), methionine sulfoxide; Nac-Gal, N-acetyl-galactosamine; Nac-Glu, N-acetyl-glucosamine; Nac-NA, N-acetyl-neuraminic acid; TMAO, trimethylamine N-oxide; UDP-Nac-Gal, uridine diphosphate-N-acetyl-galactosamine; UDP-Nac-Glu, uridine diphosphate-N-acetyl-glucosamine. C.V. (LC-MS) = Coefficient of Variation in % for MS data where no NMR data are available.

The metabolites in table S1 were identified based on our own library of standards (NMR/ LC-MS) except for N-acetyl-glucosamine, N-acetyl-neuraminic acid, N-acetyl-galactosamine, uridine diphosphate-N-acetyl-galactosamine and uridine diphosphate-N-acetyl-glucosamine where the identification was based on strong correlation between resonances observed in our 87 NMR datasets, NMR splitting patterns with coupling constants, chemical shifts of the resonances and the strong identity to the resonances (chemical shifts and coupling constants) of these molecules in the HMDB database.

**Table S2.** The number, milk yield, body weight, and energy balance (EB) of dairy cows with two dry period length (DPL, 0-day or 30-day).

|                      | Number | Milk yield <sub>1</sub> | Body weight   | EB <sub>1</sub> |
|----------------------|--------|-------------------------|---------------|-----------------|
| Cows with 0-day DPL  | 60     | 28.1±7.0 kg             | 662.5±73.0 kg | -133.4±162.8    |
| Cows with 30-day DPL | 27     | 32.0±6.9 kg             | 663.5±65.6 kg | 347.6±181.9     |

<sub>1</sub> Milk yield ( $P = 0.02$ ) and EB in kJ/kg <sup>0.75.d</sup> ( $P < 0.01$ ) are different between two groups (0-day DPL and 30-day DPL).
